CORRECTION

## Correction: Birth prevalence and determinants of neural tube defects among newborns in Ethiopia: A systematic review and meta-analysis

Beminet Moges Gebremariam, Dejene Hailu, Barbara J. Stoecker, Afework Mulugeta

There are errors in the author affiliations. The correct affiliations are as follows:

Beminet Moges Gebremariam<sup>1</sup>, Dejene Hailu<sup>2</sup>, Barbara J. Stoecker<sup>3</sup>, Afework Mulugeta<sup>4</sup>

**1** School of Nutrition, Food Science and Technology, College of Agriculture, Hawassa University, Hawassa, Ethiopia, **2** School of Public Health, College of Medicine and Health Sciences, Hawassa University, Hawassa, Ethiopia, **3** Department of Nutritional Sciences, Oklahoma State University, Stillwater, Oklahoma, United States of America, **4** Department of Public Health Sciences, Mekelle University, Mekelle, Ethiopia.

### Reference

1. Gebremariam BM, Hailu D, Stoecker BJ, Mulugeta A. Birth prevalence and determinants of neural tube defects among newborns in Ethiopia: A systematic review and meta-analysis. PLoS One. 2025;20(1):e0315122. <https://doi.org/10.1371/journal.pone.0315122> PMID: [39746047](https://pubmed.ncbi.nlm.nih.gov/39746047/)

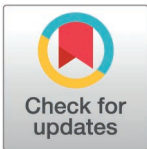

### OPEN ACCESS

**Citation:** Gebremariam BM, Hailu D, Stoecker BJ, Mulugeta A (2026) Correction: Birth prevalence and determinants of neural tube defects among newborns in Ethiopia: A systematic review and meta-analysis. PLoS One 21(2): e0342989. <https://doi.org/10.1371/journal.pone.0342989>

**Published:** February 13, 2026

**Copyright:** © 2026 Gebremariam et al. This is an open access article distributed under the terms of the [Creative Commons Attribution License](https://creativecommons.org/licenses/by/4.0/), which permits unrestricted use, distribution, and reproduction in any medium, provided the original author and source are credited.
